# Supplementary material for: Determinants of proper disposal of single-use masks: knowledge, perception, behavior, and intervention measures
Source: PeerJ. 2023 Apr 6;11:e15104. doi: 10.7717/peerj.15104 (PMC10083004; doi:10.7717/peerj.15104)
Supplement: Supplemental Information 2 [file peerj-11-15104-s002.xlsx]

## Sheet: SingUseMasks
RespondentNr	Material WetWipes	Material Mask1	Material Mask2	Material Mask3	Material Mask4	Material FaceShield	Material Gloves	Material Suit	Material Shoes	Material Shield Car	Material Shield Classroom	Categories Years Plastic decomposition	Impact sanitary waste on Waste Managemnt Activity	Reason1 to wear mask	Behavior3 mask after use	No of used masks/month	%of masks (of total that you used) that you discarded in no-allowed places (street, etc) in the recent PAST	Way 1 to reduce pollution with sanitary materials	Way 2 to reduce pollution with sanitary materials	Way 3 to reduce pollution with sanitary materials	Way 4 to reduce pollution with sanitary materials	Way 5 (other) to reduce pollution with sanitary materials	Gender	Age	Living Env	Education	Income
1	0	0	1	0	0	1	1	0	1	1	0	6	5	1	0	30	0	0	1	0	0	0	2	63	1	4	2
2	0	0	1	0	1	1	1	1	1	1	1	8	5	0	1	30	0	1	0	1	1	0	1	69	2	3	2
3	0	0	0	0	0	1	1	1	1	1	1	3	5	1	1	30	0	1	1	1	1	0	1	69	1	4	3
4	0	0	0	0	0	1	1	0	1	1	1	4	8	0	0	20	0	0	0	0	1	0	1	60	1	4	3
5	0	0	1	0	0	1	1	1	1	1	1	5	0	0	1	45	0	0	0	1	1	0	1	58	1	4	3
6	1	1	1	0	0	0	1	1	1	1	1	7	1	1	0	2	0	1	1	1	1	0	1	62	1	4	2
7	0	0	1	0	0	1	1	1	1	1	1	3	3	0	0	10	0	0	1	1	1	0	2	59	1	3	2
8	0	0	1	0	1	1	1	1	1	1	1	7	0	1	0	30	0	1	1	0	0	0	1	59	1	3	1
9	0	1	0	0	0	1	1	0	1	1	1	6	2	0	1	20	0	1	0	1	1	0	1	55	1	4	2
10	0	1	0	0	0	1	1	1	1	1	1	6	0	1	0	10	0	1	1	1	1	0	1	55	1	4	2
11	1	0	0	0	0	1	1	1	1	1	1	6	9	1	1	20	0	1	0	1	1	0	2	56	1	4	2
12	0	0	0	0	0	1	1	0	0	0	0	3	10	1	1	20	0	1	1	1	1	0	1	61	1	4	2
13	0	0	1	0	0	1	1	0	1	1	1	6	1	1	0	10	0	1	1	1	1	0	2	67	1	4	2
14	1	0	1	0	0	1	1	1	1	1	1	6	8	0	0	0	0	0	1	1	1	0	1	58	1	4	3
15	1	0	0	0	0	1	0	0	0	1	1	6	0	1	0	15	0	1	1	0	1	0	2	56	1	3	1
16	0	1	1	1	1	1	1	1	1	1	1	3	3	1	1	60	0	1	1	1	1	0	2	57	1	4	2
17	0	0	1	0	0	1	1	0	1	1	1	3	5	1	1	3	0	1	1	1	0	0	2	58	1	4	2
18	0	0	0	1	0	1	1	1	1	1	1	3	1	1	0	15	0	1	0	0	1	0	1	63	1	4	3
19	0	0	1	0	0	1	1	0	1	1	1	6	5	0	1	50	0	1	1	1	0	0	1	57	1	4	3
20	0	0	1	1	1	1	1	1	1	1	1	4	1	1	0	4	0	1	1	1	1	0	2	56	1	4	2
21	0	1	0	0	0	1	1	1	1	1	1	3	1	1	1	50	0	0	1	1	0	0	2	58	1	3	3
22	0	0	0	0	0	1	1	0	1	1	1	3	0	1	1	30	0	1	1	1	1	0	1	68	1	4	2
23	0	0	1	0	0	0	0	0	0	0	0	4	7	1	1	20	0	1	0	0	0	0	1	63	1	2	2
24	0	0	0	0	0	1	1	1	1	1	1	6	4	1	1	30	1	1	1	1	0	0	1	59	1	4	4
25	0	0	1	0	0	1	1	1	1	1	1	2	8	0	1	3	3	1	1	0	0	0	1	59	1	4	2
26	0	0	0	0	0	1	1	1	1	1	1	8	5	1	1	30	0	0	1	0	0	0	2	56	1	4	2
27	0	0	1	0	0	1	1	0	1	1	1	6	10	1	1	30	0	1	1	0	1	0	1	55	1	4	2
28	0	0	0	0	0	1	1	1	1	1	1	4	1	0	1	45	0	1	1	1	1	0	1	64	2	4	2
29	0	0	0	0	0	1	0	0	0	1	0	6	9	1	0	30	0	1	0	1	1	0	1	45	1	4	2
30	0	0	0	0	0	0	1	0	1	1	1	4	10	1	1	30	0	0	1	0	0	0	2	59	1	4	2
31	0	0	1	0	0	1	1	1	1	1	1	3	0	1	1	60	0	1	1	1	1	0	2	69	1	1	1
32	1	0	1	1	0	1	1	1	1	1	1	8	3	1	1	50	0	0	0	1	0	0	2	59	1	3	1
33	0	0	0	0	0	1	1	0	1	1	1	6	1	0	1	50	0	1	1	1	1	0	2	55	1	4	4
34	0	0	1	0	0	1	1	1	1	1	1	2	3	1	1	30	100	1	1	1	0	0	1	56	1	3	1
35	1	1	0	1	1	1	1	1	0	0	0	4	4	0	0	4	0	0	1	0	0	0	1	36	1	4	1
36	0	0	1	0	0	1	1	1	1	1	1	4	8	1	1	30	0	1	0	1	1	0	2	38	2	3	1
37	0	0	1	0	0	1	0	1	1	1	1	6	2	1	0	20	0	0	0	1	1	0	1	22	1	3	2
38	0	0	0	0	0	1	1	1	1	1	1	6	5	0	1	40	0	0	1	1	1	0	1	60	1	2	2
39	0	0	1	0	0	0	0	0	0	0	1	4	5	1	0	2	5	1	1	0	0	0	1	43	1	3	1
40	0	0	1	1	1	1	1	1	1	1	1	2	4	0	0	10	1	1	0	1	1	0	1	37	1	3	2
41	1	0	0	0	0	1	1	1	1	1	1	6	5	0	0	1	1	1	0	0	0	0	2	22	2	3	2
42	0	0	1	0	0	0	1	0	0	0	1	4	5	0	1	2	5	0	1	1	0	0	1	43	1	3	1
43	0	1	0	1	1	1	1	1	1	1	1	6	5	1	0	10	0	1	1	1	1	0	1	46	1	4	2
44	0	0	0	0	0	1	0	0	1	1	0	4	8	0	0	2	5	1	0	0	0	0	1	43	1	3	2
45	1	0	1	0	0	1	1	0	1	1	1	6	1	1	0	20	0	1	1	1	1	0	1	56	1	4	2
46	1	1	1	1	1	1	1	1	1	1	1	3	7	1	1	30	0	1	1	0	0	0	2	19	2	3	1
47	0	1	1	1	1	1	1	1	1	1	1	4	5	0	1	62	0	1	0	0	0	0	1	21	1	3	2
48	1	1	1	1	1	1	1	1	1	1	1	1	0	0	0	30	0	1	0	0	0	0	1	21	1	3	1
49	1	1	0	1	1	1	1	0	1	1	1	3	6	0	1	45	0	0	1	0	1	0	2	52	2	4	3
50	0	1	0	1	1	1	1	1	1	1	1	6	5	0	1	44	0	1	1	0	1	0	1	41	2	3	2
51	0	0	1	0	0	0	1	0	1	1	1	6	1	0	1	50	0	0	0	1	0	1	1	47	1	4	2
52	0	0	0	1	1	1	1	1	1	1	1	6	2	1	1	10	0	0	1	1	0	0	1	47	1	4	1
53	0	1	0	1	1	1	1	1	1	1	1	4	3	1	0	10	0	1	0	1	1	0	2	53	1	4	2
54	0	0	0	0	0	1	1	1	1	1	1	3	0	0	1	60	0	1	1	0	1	0	2	65	1	4	3
55	0	1	0	1	1	1	1	1	1	1	1	5	1	1	0	15	0	1	1	1	1	0	2	21	1	3	1
56	0	0	0	0	0	1	1	0	1	1	1	5	5	0	1	35	0	0	0	1	1	0	1	44	1	3	2
57	0	0	1	1	1	1	1	1	1	1	1	5	2	1	1	50	0	1	1	1	0	0	2	44	1	4	2
58	0	0	0	1	1	1	1	1	1	1	1	3	3	1	1	150	0	0	1	0	0	0	2	41	2	4	2
59	0	0	0	0	1	0	0	0	0	0	0	4	3	1	1	25	0	1	0	0	0	0	2	24	1	4	2
60	1	1	1	1	0	1	1	1	1	1	1	3	6	1	1	40	0	1	0	1	0	0	2	26	1	4	3
61	1	1	0	1	1	1	1	1	1	1	1	6	10	1	1	150	0	1	1	1	1	0	2	54	1	4	4
62	0	0	0	1	1	0	0	0	0	1	1	3	0	1	0	10	0	1	1	0	1	0	1	41	1	3	5
63	1	1	0	1	1	1	1	1	1	1	1	3	2	1	0	20	0	0	1	0	1	0	2	53	2	4	3
64	0	0	1	1	1	1	1	1	1	1	1	7	5	1	1	27	0	1	1	1	1	0	2	53	1	3	2
65	0	0	0	0	0	1	1	1	1	1	1	6	0	0	1	50	0	1	1	1	1	0	2	41	1	3	2
66	1	0	0	0	0	0	1	0	1	1	1	3	8	0	1	20	0	0	0	1	0	0	2	46	2	4	2
67	0	0	0	0	0	1	1	1	1	1	1	3	5	0	0	80	0	1	1	1	0	0	2	45	1	4	4
68	1	1	0	1	1	1	1	1	1	1	1	4	3	1	1	15	0	1	1	0	0	0	1	37	1	3	3
69	0	1	0	0	1	1	1	1	1	1	1	4	4	1	1	30	0	1	1	1	1	0	1	63	1	4	2
70	0	0	1	1	1	1	1	1	1	1	1	4	7	0	1	60	0	1	0	0	0	0	1	21	1	3	2
71	0	1	0	0	0	1	1	1	1	1	1	6	10	0	0	10	0	1	1	1	1	0	1	54	1	4	3
72	1	0	0	0	0	1	1	1	1	1	1	4	3	1	1	25	0	1	0	0	1	0	1	51	1	4	5
73	0	1	1	1	1	1	1	1	1	1	1	6	5	0	1	50	0	0	0	0	1	0	1	44	1	3	2
74	0	0	1	0	0	1	1	0	1	0	0	5	2	0	1	28	0	0	0	1	0	0	2	43	1	3	2
75	1	0	0	0	0	1	1	0	1	1	1	6	5	1	0	30	0	0	1	1	0	0	2	32	1	3	3
76	1	0	1	0	1	1	1	1	1	1	1	4	4	0	1	50	0	0	0	1	1	0	1	38	1	4	1
77	0	0	0	0	0	0	0	0	0	0	0	6	0	0	0	0	0	0	0	0	0	1	2	49	1	4	6
78	0	0	1	0	0	1	1	1	1	1	1	6	1	0	1	20	0	1	0	1	0	0	2	47	2	4	2
79	1	1	0	0	0	1	1	1	1	1	1	2	5	1	1	0	0	0	1	1	0	0	2	34	1	4	3
80	0	0	0	0	0	1	1	1	1	1	1	6	0	1	1	10	0	1	1	1	1	0	1	35	1	4	3
81	0	1	0	0	0	1	1	1	1	1	1	8	5	0	0	1	0	1	1	1	1	0	2	30	1	4	3
82	0	1	1	0	1	1	1	1	1	1	1	6	10	0	1	8	0	1	0	0	1	0	1	21	1	4	1
83	0	0	1	1	1	1	1	1	1	1	1	3	0	1	1	20	0	0	0	1	0	0	2	51	1	4	2
84	0	1	1	1	1	1	1	1	1	1	1	3	1	1	1	30	0	1	1	1	0	0	2	42	1	4	2
85	0	0	1	1	0	1	1	1	1	1	1	2	1	1	1	30	0	1	1	1	0	0	2	20	1	4	1
86	0	0	1	0	0	1	0	1	1	0	1	3	4	0	1	25	10	0	1	0	1	0	2	33	1	4	4
87	0	1	0	1	1	1	0	1	1	1	1	5	7	1	1	21	0	0	0	0	1	0	1	44	1	3	2
88	1	1	1	0	0	1	1	1	1	1	1	7	0	0	1	30	0	0	0	1	1	0	1	60	1	3	3
89	0	1	1	1	0	1	1	0	1	1	1	3	5	1	1	20	0	1	1	1	1	0	2	20	2	4	2
90	0	0	0	0	0	0	0	0	0	0	0	4	6	0	0	0	0	0	0	1	0	0	1	46	1	4	3
91	0	0	0	0	0	0	0	0	0	0	0	2	10	0	1	50	0	1	0	0	0	0	2	25	1	4	3
92	0	1	1	1	1	1	1	1	1	1	1	6	3	1	0	10	0	1	1	1	1	0	2	20	2	3	1
93	0	1	1	0	1	1	1	1	1	1	1	2	6	1	1	30	0	1	0	0	0	0	2	20	2	4	1
94	0	0	1	0	0	1	1	1	1	1	1	3	3	0	0	1	0	1	1	1	0	0	2	33	1	4	2
95	0	0	0	0	0	1	1	1	1	1	1	4	4	0	1	29	90	0	0	1	0	0	1	43	1	3	2
96	1	1	1	0	0	1	1	1	1	1	1	5	3	1	1	25	0	1	1	0	1	0	1	25	2	4	2
97	0	1	1	1	1	1	1	1	1	1	1	3	5	1	1	30	0	0	1	0	1	0	2	60	1	4	2
98	0	0	1	1	1	1	1	0	1	0	1	6	6	0	1	30	0	0	0	0	1	0	2	55	1	4	2
99	1	1	0	0	0	1	1	1	1	1	1	4	1	1	0	1	0	0	0	0	0	1	2	65	1	4	3
100	1	0	0	0	0	1	1	0	1	0	0	5	6	1	1	29	0	1	1	0	1	0	2	55	1	4	3
101	0	0	0	1	1	1	1	1	1	1	1	6	1	1	1	30	0	1	1	1	1	0	2	66	1	4	2
102	1	0	1	0	0	1	1	1	1	0	1	4	2	0	0	20	60	0	0	0	1	0	2	55	1	4	2
103	0	0	1	0	0	0	1	0	1	1	1	6	10	1	0	4	0	1	0	0	0	0	2	70	1	3	2
104	0	0	1	0	0	0	1	0	1	1	1	4	5	1	1	22	0	0	1	0	1	0	2	59	1	4	3
105	0	0	1	0	1	1	1	1	1	1	1	4	5	1	1	30	0	1	1	1	0	0	2	58	1	4	3
106	1	1	0	1	1	1	1	1	1	1	1	6	0	1	1	50	0	1	0	1	1	0	2	55	1	4	3
107	0	0	1	0	0	1	1	1	1	1	1	2	4	1	1	30	0	1	0	1	1	0	2	61	1	4	3
108	0	0	0	0	0	1	1	0	1	1	1	6	2	0	0	30	0	1	1	1	1	0	2	61	1	4	2
109	0	0	0	0	0	1	1	1	1	1	1	4	9	0	0	15	0	1	1	1	1	0	2	60	1	4	5
110	0	0	1	0	0	1	1	1	1	1	1	6	4	1	1	30	0	0	1	0	1	0	2	69	1	3	2
111	0	0	0	0	0	1	0	1	1	1	1	4	0	1	1	20	0	1	0	1	0	0	2	56	2	4	3
112	1	1	0	1	1	1	1	1	1	1	1	3	10	1	1	50	0	1	1	1	1	0	2	58	1	4	2
113	0	0	0	0	0	1	0	0	0	0	1	8	3	0	1	30	60	1	1	1	1	0	2	62	1	4	2
114	0	0	1	0	0	1	1	1	1	1	1	6	2	1	0	15	0	1	1	1	0	0	2	60	1	3	2
115	0	1	0	1	1	1	1	1	1	1	1	4	1	0	1	30	0	1	0	1	1	0	2	56	2	3	3
116	1	1	0	0	0	1	1	1	1	1	1	6	1	1	1	50	0	1	1	0	0	0	2	61	1	4	2
117	0	1	0	1	1	1	1	1	1	1	1	6	3	1	1	5	0	0	1	1	0	0	2	55	1	4	3
118	0	0	0	0	0	1	1	1	1	1	1	6	5	1	0	15	0	1	1	1	1	0	2	70	1	4	2
119	0	1	1	0	1	1	1	1	1	1	1	4	1	1	0	15	0	1	1	1	0	0	2	58	2	4	2
120	0	0	0	1	1	1	1	0	1	1	1	6	6	1	1	20	0	1	1	1	1	0	2	76	1	4	2
121	0	1	1	0	0	1	1	0	0	1	1	3	10	1	1	30	0	1	1	1	1	0	2	55	2	1	1
122	0	0	0	0	0	1	1	1	1	1	1	8	0	1	1	30	0	0	1	1	1	0	2	55	1	4	4
123	0	1	0	1	1	0	1	1	1	1	1	6	0	1	0	20	0	0	1	1	1	0	2	68	1	3	2
124	0	0	0	0	0	1	1	1	1	1	1	3	5	1	0	10	0	1	1	1	1	0	2	56	1	4	3
125	0	0	1	0	0	1	1	0	1	1	1	6	10	1	1	30	0	1	1	1	1	0	2	56	1	4	3
126	0	0	1	1	1	1	1	1	1	1	1	4	0	1	1	100	0	1	1	1	1	0	2	63	1	4	3
127	0	0	0	0	0	1	1	0	1	1	1	4	5	1	1	10	0	1	1	0	1	0	2	64	1	4	2
128	0	1	0	1	1	1	1	1	1	1	1	6	0	0	0	30	0	0	1	1	0	1	2	61	1	3	2
129	0	0	1	1	0	1	1	0	1	1	1	6	7	1	1	150	0	1	1	1	1	0	2	60	1	3	1
130	0	0	1	0	0	1	1	1	1	1	0	6	3	1	1	40	0	1	1	1	1	0	2	64	1	4	2
131	0	0	1	0	0	1	1	1	1	0	0	3	1	1	0	10	0	1	0	0	0	0	2	32	1	4	2
132	1	0	0	0	0	1	1	1	1	1	1	4	5	1	1	10	0	0	1	1	1	0	2	33	1	3	1
133	0	1	0	0	0	1	1	1	1	1	1	4	1	0	1	60	0	1	1	1	1	0	2	58	1	4	3
134	0	1	0	1	0	1	0	0	1	1	1	6	3	0	1	15	0	0	1	1	1	0	2	63	1	4	2
135	0	0	1	1	1	1	1	0	1	1	1	4	4	1	0	8	0	0	1	0	0	0	2	58	1	4	3
136	0	0	1	0	0	1	1	1	1	1	1	4	3	1	1	40	0	1	1	1	0	0	2	59	1	4	3
137	0	0	0	0	0	0	1	0	1	1	1	8	0	1	1	30	0	1	1	1	1	0	2	66	1	3	2
138	1	1	1	1	0	1	0	1	1	1	1	5	4	1	1	20	0	1	1	0	0	0	2	58	1	4	4
139	0	0	0	0	0	1	1	0	1	1	1	8	2	1	1	30	0	0	0	1	0	0	2	64	1	2	2
140	0	1	0	0	0	1	1	1	1	1	1	4	3	0	0	30	0	0	0	1	0	0	2	59	2	4	3
141	0	1	1	1	1	1	1	1	1	1	1	6	6	1	0	15	0	1	1	1	0	0	2	21	1	4	2
142	0	0	1	0	0	1	1	0	1	1	0	4	5	0	0	15	0	0	0	1	0	0	2	60	1	3	2
143	0	0	1	1	1	1	1	1	1	1	1	3	1	1	1	15	0	1	1	1	1	0	2	56	1	4	3
144	0	1	0	0	0	1	1	1	1	1	1	4	7	0	0	4	0	0	1	1	1	0	2	20	1	3	2
145	0	0	1	0	0	1	1	1	1	1	1	4	10	1	1	30	100	1	1	1	1	0	1	64	2	3	3
146	0	0	1	0	1	1	1	1	1	1	1	4	2	0	1	30	0	0	1	1	0	0	2	64	1	3	2
147	0	0	1	0	0	1	1	0	1	1	1	4	7	1	1	100	0	1	0	1	0	0	2	64	1	3	4
148	0	0	1	0	0	1	1	0	1	1	1	4	2	1	1	30	0	1	1	1	1	0	2	56	1	4	3
149	0	0	0	0	0	0	1	1	1	1	0	6	5	1	1	20	0	0	0	1	0	0	1	72	1	4	2
150	0	0	0	0	0	1	1	0	1	1	1	4	5	1	0	4	0	1	1	1	1	0	1	67	1	4	2
151	0	0	1	0	0	1	1	1	1	1	1	5	4	0	1	30	0	0	1	1	1	0	1	71	1	4	2
152	0	0	0	0	0	0	0	0	1	1	1	6	0	1	1	30	0	1	1	1	1	0	1	63	1	4	2
153	0	0	1	1	0	1	1	0	1	1	1	4	5	0	1	30	0	1	1	0	1	0	1	56	1	3	3
154	0	0	1	1	1	1	1	1	1	1	1	6	1	1	1	30	0	1	1	1	1	0	1	58	2	4	2
155	0	0	1	0	0	1	1	1	1	1	1	3	5	1	1	30	50	0	0	1	0	0	1	59	2	4	2
156	0	0	0	0	0	1	1	1	1	1	1	6	4	1	0	10	1	1	1	1	0	0	1	68	1	4	3
157	1	1	1	0	0	0	1	1	0	0	0	6	3	0	1	5	0	1	1	1	0	0	1	64	2	3	2
158	1	0	0	0	0	0	1	1	1	1	1	6	7	0	1	50	0	0	1	1	0	0	1	65	1	4	2
159	1	1	0	1	1	1	1	1	1	1	1	2	6	1	1	30	0	1	0	0	0	0	2	60	2	4	3
160	0	0	0	0	0	1	0	0	1	1	1	6	4	1	0	4	0	1	1	1	1	0	1	63	1	4	4
161	0	0	0	0	0	1	1	1	1	1	1	6	4	0	0	30	0	1	1	1	0	0	1	66	1	4	3
162	0	0	1	0	0	1	1	0	1	1	1	4	4	0	1	15	0	1	0	1	0	0	1	67	1	4	3
163	0	0	0	0	0	0	1	1	0	1	0	3	5	1	1	25	0	1	0	0	0	0	1	67	1	4	2
164	0	0	0	0	0	1	1	0	1	1	1	4	2	1	1	30	0	0	1	1	1	0	1	67	1	4	2
165	0	0	1	0	0	0	0	0	0	0	0	2	10	0	0	20	0	1	1	1	1	0	1	68	1	3	3
166	1	1	0	1	1	1	1	1	1	1	1	4	2	0	0	10	0	0	1	1	0	0	2	62	1	3	3
167	1	0	1	0	0	1	1	1	1	1	1	4	0	0	0	15	0	1	1	1	1	0	2	56	1	3	2
168	0	0	1	0	0	1	1	0	1	1	0	6	0	0	1	60	0	1	1	1	1	0	1	72	1	3	2
169	0	0	0	0	0	0	0	1	0	0	1	6	10	1	1	20	100	0	0	0	1	0	2	59	1	2	6
170	0	0	1	0	0	1	1	0	1	1	1	7	8	0	1	28	0	1	1	1	0	0	2	56	1	3	2
171	0	0	1	0	0	1	1	0	1	1	1	5	5	1	1	30	0	1	1	1	1	0	1	72	1	4	3
172	1	1	1	1	1	1	1	1	1	1	1	4	3	0	1	3	2	0	1	1	1	0	1	33	1	4	3
173	0	0	1	0	0	1	1	0	1	1	1	6	2	0	1	25	0	0	0	1	0	0	2	51	1	3	3
174	0	0	1	1	1	1	1	0	1	1	1	4	4	1	0	10	0	0	1	1	1	0	1	62	1	4	3
175	1	1	1	0	0	1	1	1	1	1	1	3	4	1	0	10	0	1	1	1	1	0	1	69	1	4	3
176	0	1	0	0	0	1	1	1	1	1	1	6	0	0	0	1	0	0	1	0	0	0	1	63	1	4	3
177	0	0	1	0	0	0	0	0	0	0	0	3	4	1	1	3	40	0	0	0	1	0	1	63	1	4	3
178	0	0	1	0	0	1	1	1	1	1	1	4	5	0	0	5	0	0	1	0	1	0	1	72	1	4	3
179	0	0	0	1	1	1	1	1	1	1	1	4	0	1	1	30	0	1	1	1	1	0	2	55	1	4	2
180	0	1	0	1	0	1	1	1	1	1	1	8	1	0	0	1	0	1	1	1	1	0	1	30	1	4	6
181	0	0	1	1	0	1	1	1	1	1	1	5	3	1	1	5	0	0	1	0	0	0	1	62	1	4	1
182	0	0	1	0	0	1	0	0	1	0	1	6	1	1	1	50	0	0	1	0	0	0	2	59	1	2	1
183	1	1	1	0	0	1	1	1	1	1	1	6	7	1	0	3	0	0	1	1	1	0	2	30	1	4	5
184	0	0	0	0	0	1	1	1	1	1	1	3	5	1	1	20	0	0	1	1	0	0	1	30	1	4	3
185	0	0	0	0	0	1	1	1	1	1	1	4	5	1	0	10	0	1	1	1	1	0	1	72	2	4	2
186	0	0	0	0	0	1	1	1	1	0	1	6	3	1	1	30	0	1	1	1	1	0	1	62	1	4	3
187	0	0	0	0	1	0	0	0	0	0	1	4	6	1	0	4	0	1	1	1	1	0	1	28	1	3	2
188	0	1	1	1	0	1	1	1	1	1	1	5	1	0	0	20	0	1	1	1	1	0	1	34	1	3	1
189	1	1	0	0	0	1	1	1	1	1	1	6	3	1	0	8	0	0	1	0	0	0	1	31	2	4	3
190	1	1	1	1	0	1	1	1	1	1	1	6	5	0	0	2	0	1	1	1	1	0	1	55	1	3	2
191	0	1	0	0	0	1	1	1	1	1	1	6	2	1	1	6	0	1	1	1	1	0	1	65	1	4	2
192	1	1	0	1	1	1	1	1	1	1	1	3	3	1	1	50	0	1	1	0	0	0	2	31	1	4	3
193	1	1	0	0	0	1	1	1	1	1	1	6	3	1	1	30	0	0	1	1	0	0	1	59	1	4	3
194	1	1	0	0	0	1	1	1	1	1	1	6	5	1	1	50	0	1	0	0	0	0	1	29	1	4	1
195	0	0	1	0	0	1	1	1	1	1	1	3	4	1	1	15	0	1	1	1	1	0	2	62	1	3	2
196	0	0	1	0	0	1	1	0	0	1	1	3	5	0	0	15	0	0	0	0	1	0	2	55	1	3	3
197	0	0	0	0	0	1	1	0	1	1	1	3	3	1	1	30	0	1	1	1	1	0	2	55	1	3	2
198	1	1	0	1	1	1	1	1	1	1	1	6	0	1	0	20	0	1	1	0	0	0	1	63	1	4	2
199	0	0	1	1	1	1	1	1	1	1	1	5	5	0	1	30	0	0	1	0	1	0	1	34	1	4	2
200	0	0	1	0	0	1	1	0	1	1	1	6	9	1	1	50	0	1	0	0	0	0	1	33	1	4	4
201	0	0	1	0	0	1	1	0	1	1	1	2	1	0	1	100	0	1	0	1	0	0	2	59	2	4	2
202	1	0	1	0	0	1	1	1	1	1	1	6	5	1	1	20	0	1	1	1	1	0	1	54	1	4	3
203	0	0	0	0	0	1	1	1	1	1	1	5	2	0	0	7	0	0	1	0	0	0	1	62	1	2	2
204	1	1	1	1	1	1	1	1	1	0	0	2	0	1	1	25	0	1	0	1	1	0	1	58	1	4	4
205	0	1	0	0	0	1	1	1	1	1	1	4	6	0	0	8	0	0	0	1	0	0	1	32	1	3	3
206	0	1	0	0	0	1	1	1	1	1	1	4	5	0	0	5	0	1	0	0	1	0	1	32	1	3	2
207	0	0	1	0	0	1	1	0	1	1	1	4	10	0	1	15	99	1	0	1	0	0	1	66	1	4	2
208	0	0	0	0	0	0	0	0	0	0	0	3	7	0	1	25	80	0	1	0	0	0	1	30	1	3	2
209	0	0	1	0	0	1	1	0	1	1	1	6	2	0	1	24	0	1	1	1	1	0	1	56	1	4	4
210	0	0	1	0	0	1	1	1	1	1	1	4	1	1	1	15	0	0	1	1	1	0	2	60	1	4	5
211	0	1	1	1	1	1	1	1	1	1	1	4	6	0	0	10	0	0	0	0	1	0	1	29	1	3	2
212	1	1	0	0	1	1	1	1	1	1	1	3	5	0	1	30	0	0	0	1	0	0	2	34	1	4	2
213	0	0	0	0	0	1	1	1	1	1	1	6	7	1	0	15	0	1	1	1	1	0	1	31	1	4	3
214	1	1	0	1	0	1	1	1	1	1	1	4	3	1	1	30	0	0	1	0	0	0	1	60	1	4	3
215	0	0	0	0	0	1	1	0	1	1	1	5	2	1	1	60	0	1	1	1	0	0	1	29	1	4	2
216	0	1	0	1	1	1	1	1	1	1	1	3	0	1	0	10	0	1	0	1	1	0	1	28	1	3	2
217	0	0	1	0	0	1	1	1	1	1	1	4	10	0	1	30	0	0	1	0	0	0	1	33	2	2	2
218	1	1	1	0	0	1	0	0	1	1	1	6	5	1	0	6	0	0	0	1	1	0	1	55	1	4	5
219	0	0	0	0	0	0	0	0	0	0	0	2	7	1	1	30	70	0	0	1	0	0	1	30	1	3	2
220	1	1	1	1	1	1	1	1	1	1	1	2	6	1	1	20	0	1	1	1	0	0	1	25	1	4	3
221	1	1	1	1	1	1	1	1	1	1	1	5	0	1	0	20	0	0	1	0	1	0	2	44	1	4	2
222	0	0	0	0	0	1	1	0	1	1	1	4	7	0	1	30	0	1	0	1	1	0	2	53	1	4	3
223	0	1	0	1	1	1	1	1	1	1	1	2	5	0	1	30	0	1	1	1	1	0	1	20	1	3	3
224	0	0	0	0	0	1	1	0	1	1	1	5	4	0	1	30	0	0	0	1	1	0	1	50	2	4	2
225	0	1	0	1	1	1	0	0	1	1	1	4	3	1	1	30	0	1	1	0	1	0	2	53	2	4	2
226	0	0	0	0	0	1	1	1	1	1	1	6	3	1	1	5	0	1	1	1	1	0	1	41	1	4	4
227	1	1	1	1	1	1	1	1	1	1	1	5	5	1	0	10	0	1	1	1	1	0	2	40	1	4	2
228	1	1	0	0	0	1	1	1	1	1	1	7	0	1	1	130	0	0	1	1	0	0	2	51	1	4	2
229	1	1	1	1	1	1	1	0	1	1	1	3	8	1	1	20	0	1	1	1	0	0	2	41	1	4	2
230	1	1	0	1	1	1	1	1	1	1	1	6	0	1	1	13	0	0	0	1	0	0	2	41	1	4	2
231	0	0	0	0	0	0	1	0	1	1	1	5	5	0	0	3	0	0	1	0	0	1	1	43	1	4	3
232	0	0	0	0	0	1	1	1	1	1	1	8	5	0	0	20	0	0	0	0	1	0	1	66	1	3	1
233	1	1	0	0	0	1	1	1	1	1	1	6	4	1	0	10	0	0	1	1	1	0	1	61	1	4	3
234	1	0	1	0	0	1	1	1	1	1	1	3	7	0	1	1	0	1	0	0	0	0	1	31	1	4	2
235	0	0	0	1	1	1	1	1	1	1	1	4	5	1	1	30	0	0	1	0	0	0	2	58	1	4	3
236	1	0	1	1	1	1	1	1	1	1	1	4	8	1	0	4	0	1	0	1	1	0	1	54	1	4	3
237	0	0	0	0	0	1	1	1	1	0	1	6	6	1	1	15	0	0	1	0	0	0	2	65	1	4	3
238	1	0	0	0	0	1	1	1	1	1	1	3	0	1	1	30	0	1	1	1	1	0	2	54	1	4	2
239	0	0	0	0	0	1	1	1	1	1	1	2	3	1	0	10	0	0	1	0	0	0	1	40	1	4	3
240	0	0	0	0	0	0	0	0	0	1	1	3	4	0	0	10	0	0	1	0	0	0	1	21	1	3	2
241	0	1	0	1	1	1	1	1	1	1	1	8	10	0	0	20	0	0	0	1	0	0	1	33	1	4	6
242	1	1	0	0	0	1	1	0	1	1	1	1	0	1	1	40	0	0	1	1	0	0	2	44	1	4	2
243	0	0	0	0	0	1	1	1	1	1	1	4	0	0	0	5	0	1	1	1	1	0	2	31	1	3	2
244	0	1	1	1	0	1	1	1	1	1	1	5	0	0	1	60	0	1	1	1	1	0	1	24	1	3	1
245	1	1	0	1	1	1	1	1	1	1	1	6	6	1	1	20	0	1	0	1	1	0	1	40	1	4	2
246	0	0	0	0	0	1	1	1	1	1	1	4	2	1	0	100	0	1	1	1	1	0	1	44	1	4	2
247	0	0	1	0	0	1	1	0	1	1	1	3	4	1	1	20	0	1	1	1	1	0	2	57	1	4	4
248	1	1	1	1	1	1	1	1	1	1	1	4	9	0	0	20	0	1	1	1	0	0	2	40	1	4	2
249	1	1	0	1	1	1	1	1	1	1	1	4	5	1	0	10	0	0	0	1	1	0	2	63	1	3	2
250	1	0	0	0	0	1	1	1	1	1	1	3	6	0	0	3	0	1	1	0	1	0	2	35	1	4	3
251	0	0	0	1	1	1	1	1	1	1	1	6	3	0	0	1	0	0	0	0	1	0	2	40	1	4	5
252	1	1	0	1	1	1	1	1	1	1	1	6	1	1	1	30	0	1	1	1	1	0	1	32	1	4	3
253	1	1	1	1	1	1	1	1	1	1	1	5	2	0	1	25	0	0	1	1	1	0	2	48	1	4	1
254	0	0	0	1	0	1	1	0	0	0	1	3	5	1	1	20	0	1	0	0	0	0	2	65	1	4	2
255	0	0	1	0	0	1	1	0	1	1	0	5	7	1	1	30	2	1	1	1	1	0	2	23	1	4	4
256	0	1	1	1	0	1	1	1	1	1	1	4	1	1	0	25	0	1	0	1	0	0	1	37	1	4	2
257	0	1	1	1	1	1	1	1	1	1	1	4	3	0	0	10	0	0	1	1	0	0	1	22	1	4	2
258	1	1	1	1	1	1	1	0	1	1	1	4	10	1	1	40	0	1	1	1	0	0	2	24	1	4	3
259	0	1	1	1	0	1	1	1	1	1	1	5	1	0	0	10	0	0	1	0	0	0	2	33	1	4	2
260	1	1	1	0	0	1	1	1	1	1	1	4	4	1	1	30	0	0	1	1	0	0	1	29	1	4	4
261	0	0	1	0	0	1	1	0	1	1	1	3	1	0	0	10	0	0	0	0	0	1	2	32	1	4	2
262	1	1	0	1	1	1	1	1	1	1	1	4	3	1	0	1	2	1	1	1	1	1	1	22	2	1	2
263	0	0	1	0	0	1	1	0	1	0	0	4	7	1	0	10	50	1	0	0	0	0	1	19	1	4	2
264	0	0	1	1	1	1	1	1	1	1	1	7	0	1	0	6	0	1	1	1	1	0	2	41	1	4	1
265	0	0	1	0	0	1	1	1	1	1	1	6	5	1	0	15	0	1	1	1	0	0	2	26	1	4	2
266	1	0	0	1	1	1	1	1	1	1	1	5	1	0	1	60	100	0	1	1	1	0	1	41	1	4	4
267	1	1	0	0	0	1	1	1	1	1	1	2	5	0	0	25	0	1	1	0	0	0	2	24	2	4	1
268	1	1	1	1	1	1	1	1	1	1	1	4	1	0	1	7	0	0	0	1	0	0	1	44	2	2	1
269	1	1	0	1	0	1	1	1	1	1	1	6	0	0	1	30	0	1	1	0	1	0	2	53	1	4	3
270	0	0	1	0	0	0	1	0	0	0	1	6	5	1	1	31	0	1	0	0	0	0	1	24	2	4	2
271	0	0	1	0	0	0	0	0	0	0	0	3	7	1	1	30	0	1	0	0	0	0	2	38	1	4	2
272	0	0	1	0	1	1	1	1	1	1	1	3	3	1	0	10	0	1	1	1	1	0	1	54	1	4	3
273	0	0	1	1	1	1	1	1	1	1	1	3	10	1	0	6	0	1	1	0	1	0	2	61	1	4	2
274	0	1	1	0	0	1	1	1	1	1	1	4	1	1	1	3	0	1	1	1	1	0	2	63	2	4	3
275	1	1	0	1	1	1	1	1	1	1	1	6	5	1	0	20	0	1	1	1	1	0	1	40	2	4	6
276	0	0	1	0	0	0	1	0	1	1	1	4	1	0	1	60	0	1	1	1	1	0	1	32	1	3	2
277	0	1	1	1	1	1	1	1	1	1	1	4	4	1	1	5	0	1	1	1	1	0	2	23	1	4	2
278	0	0	0	0	1	0	0	1	0	0	1	2	7	1	1	5	50	0	1	0	1	0	1	22	1	3	4
279	1	1	0	1	1	1	1	1	1	1	1	3	3	1	0	20	0	1	1	1	0	0	2	58	1	4	3
280	1	1	0	0	0	1	1	1	1	1	1	4	3	0	1	30	0	0	1	0	0	0	1	29	1	4	2
281	0	1	1	1	1	1	1	1	1	1	1	4	8	1	1	60	0	1	0	0	0	0	1	34	1	4	4
282	1	1	0	0	1	1	1	1	1	1	1	7	5	0	0	2	0	0	1	1	0	0	1	38	1	4	2
283	0	1	1	0	1	0	1	1	1	1	0	6	7	1	1	30	0	1	0	0	1	0	2	31	1	4	2
284	0	1	1	1	1	1	1	1	1	1	1	4	5	0	0	1	0	0	1	0	0	0	1	19	1	4	3
285	0	0	0	0	0	1	1	0	1	1	1	5	7	1	1	0	0	1	0	1	1	0	1	64	1	4	2
286	1	1	1	1	1	1	1	1	1	1	1	3	8	1	0	19	0	0	1	1	0	0	2	21	1	4	4
287	0	0	1	0	0	1	1	1	1	1	1	3	4	1	0	20	0	1	0	0	0	0	1	34	1	3	1
288	0	1	0	1	1	1	1	1	1	1	1	4	9	0	0	10	0	1	0	1	1	0	1	38	2	4	2
289	1	1	0	0	0	1	1	1	1	1	1	4	4	1	1	40	0	1	1	1	1	0	1	41	1	3	2
290	1	1	0	1	1	1	0	0	1	1	1	6	1	1	1	50	0	1	1	1	1	0	2	51	1	4	2
291	1	1	0	1	0	1	1	1	1	1	1	4	3	0	1	200	0	1	1	0	0	0	1	31	1	3	3
292	0	1	1	1	1	1	1	1	1	1	1	4	0	0	1	30	0	1	0	0	0	0	2	41	1	4	3
293	1	0	0	1	1	0	1	1	0	1	1	4	5	0	1	15	0	1	1	0	0	0	1	22	1	4	2
294	0	0	0	0	0	1	1	1	1	1	1	6	6	1	0	15	0	1	1	1	1	0	1	43	1	4	5
295	0	0	1	0	0	1	1	1	1	1	1	6	2	1	1	30	0	0	0	1	0	0	1	27	1	4	3
296	1	0	0	0	0	1	1	0	1	1	1	7	4	1	0	15	0	0	0	1	0	0	2	65	1	4	1
297	1	1	0	1	1	1	1	1	1	1	1	6	3	0	0	3	0	0	1	0	0	0	2	42	1	4	2
298	0	0	0	0	0	0	0	0	0	0	0	2	3	0	0	30	1	1	0	0	0	0	1	32	1	3	2
299	1	1	0	1	1	1	1	1	1	1	1	6	5	1	1	30	100	1	1	0	0	0	1	34	1	4	3
300	0	0	1	0	0	1	1	0	1	1	1	4	3	0	0	15	0	1	1	1	1	0	1	72	1	4	3
301	0	1	0	0	1	0	0	1	0	1	0	2	5	0	1	40	8	1	1	0	0	0	1	30	1	4	4
302	0	1	1	1	1	1	1	1	1	1	1	5	2	0	1	15	0	0	0	1	0	0	2	43	1	3	2
303	0	1	1	0	0	1	1	1	1	1	1	4	5	1	1	15	0	1	0	1	1	0	2	43	1	4	1
304	1	0	1	0	1	1	1	1	1	1	1	4	1	1	1	20	0	1	1	1	1	0	2	36	1	4	2
305	0	0	1	0	0	1	1	1	1	1	1	4	0	1	0	5	0	1	0	1	1	0	1	49	2	2	1
306	1	1	0	1	1	1	1	1	1	1	1	6	5	0	0	3	0	0	0	0	0	1	2	69	1	4	2
307	0	1	0	1	1	1	1	1	1	1	1	3	1	1	1	35	0	1	1	1	0	0	1	40	1	4	3
308	0	0	1	0	0	1	1	1	1	1	1	5	1	1	0	5	0	0	0	1	0	0	2	43	1	4	2
309	1	1	1	1	1	1	1	0	1	1	1	4	10	1	1	30	0	0	1	1	0	0	2	25	1	4	2
310	1	1	1	1	1	1	1	1	1	1	1	6	7	0	0	20	30	1	0	0	1	0	2	22	1	2	2
311	1	0	1	1	0	1	1	1	1	1	1	3	2	1	1	30	100	1	1	0	1	0	1	50	1	4	3
312	1	1	1	0	0	1	1	1	1	1	1	6	1	1	1	25	0	1	1	1	1	0	1	42	1	4	4
313	1	1	0	0	0	1	1	1	1	1	1	5	6	0	0	3	0	0	1	1	0	0	1	32	1	4	2
314	1	1	1	1	1	1	1	1	1	1	1	6	3	1	1	50	0	1	1	1	0	0	2	64	2	4	2
315	0	0	1	1	0	1	1	1	1	1	1	3	6	1	1	30	30	0	1	0	0	0	2	33	1	3	2
316	1	1	0	1	1	1	1	1	1	1	1	2	4	0	0	15	0	1	1	1	1	0	2	23	1	4	3
317	1	1	1	0	0	1	1	1	1	1	1	4	4	1	1	30	0	1	0	0	1	0	2	34	1	4	2
318	0	0	0	0	1	1	1	0	1	1	1	3	1	1	0	15	0	1	1	1	1	0	2	60	1	3	2
319	1	1	0	1	1	1	1	1	1	1	1	6	9	1	0	30	0	0	0	1	0	0	1	36	1	4	3
320	0	1	0	1	1	1	1	1	1	1	1	6	4	1	1	10	0	0	0	1	0	0	1	41	1	4	4
321	0	1	0	1	1	1	1	1	1	1	1	5	9	1	1	20	0	1	1	0	0	0	1	50	1	3	2
322	0	1	0	0	0	1	0	1	1	0	0	6	6	1	0	0	0	1	1	1	1	0	2	45	1	4	3
323	1	0	0	0	0	1	1	1	1	1	0	4	8	0	0	30	0	1	0	0	1	0	2	55	2	4	3
324	1	1	1	0	0	0	0	0	0	0	0	5	6	0	0	5	25	0	1	1	0	0	1	37	1	4	3
325	0	0	0	0	0	1	1	1	1	1	1	3	6	0	0	5	0	0	0	1	0	0	2	43	1	4	2
326	0	0	1	0	0	1	1	1	1	1	1	5	5	1	1	22	2	1	0	0	1	0	1	66	1	3	2
327	1	0	0	1	1	1	1	1	1	1	1	4	7	0	1	30	0	1	1	1	0	0	1	64	2	3	2
328	1	1	0	1	1	1	1	1	1	1	1	2	3	0	1	15	0	0	0	0	1	0	2	21	2	3	3
329	0	1	0	0	0	1	1	1	1	1	1	4	5	0	0	10	0	0	0	0	1	0	2	44	1	4	2
330	0	1	0	1	0	1	1	1	1	1	1	6	5	1	1	20	0	1	1	1	0	0	2	42	1	4	3
331	0	0	1	0	0	1	1	0	1	1	1	8	3	1	1	6	0	0	0	0	1	0	2	34	1	3	1
332	0	0	1	0	0	1	1	1	1	1	1	3	10	1	1	30	0	1	1	1	1	0	2	36	1	3	1
333	0	0	1	1	1	1	1	0	1	1	1	4	6	1	1	10	0	1	1	1	1	0	2	21	2	3	1
334	1	1	0	1	1	1	1	1	1	1	1	3	3	0	1	20	0	0	1	1	0	0	2	21	2	4	2
335	0	0	1	0	0	1	1	1	1	1	1	5	4	0	1	20	0	0	0	1	0	0	1	32	2	2	1
336	0	1	1	1	0	1	1	0	1	1	1	3	0	1	0	15	0	0	1	0	0	0	2	42	1	4	6
337	0	1	0	1	1	1	1	1	1	1	1	4	5	0	0	0	0	0	0	0	0	1	1	32	1	1	1
338	0	0	0	0	0	0	1	1	1	1	1	4	5	0	1	30	0	1	0	0	0	0	1	51	2	4	2
339	0	1	0	1	0	1	1	1	1	1	1	3	1	1	1	20	0	0	1	1	0	0	2	35	2	4	2
340	1	0	0	1	0	1	1	1	1	0	0	4	5	1	1	30	0	1	0	0	0	0	1	55	1	4	3
341	1	1	1	1	1	1	1	1	1	1	1	6	5	1	1	30	0	1	1	1	1	0	1	43	1	4	2
342	0	0	0	0	0	1	1	0	1	1	1	4	2	0	0	5	0	1	1	1	1	0	2	46	1	4	1
343	1	0	1	0	0	1	1	1	1	1	1	3	5	1	1	20	1	0	0	1	1	0	2	39	2	4	1
344	0	0	1	1	0	1	1	1	1	1	1	3	5	1	1	35	0	1	0	1	1	0	2	59	1	4	2
345	0	0	1	0	0	1	1	0	1	0	0	4	4	0	1	25	0	0	0	0	1	0	2	25	2	4	1
346	0	1	1	1	1	1	1	1	1	1	1	6	7	0	0	5	0	0	0	0	1	0	1	36	1	4	2
347	0	1	0	0	0	1	1	1	1	1	1	6	1	0	1	40	0	1	1	1	1	0	2	29	1	3	2
348	0	1	0	0	0	1	0	0	1	1	1	4	5	0	1	10	0	1	1	1	1	0	1	40	1	3	3
349	1	1	1	0	0	1	1	1	1	1	1	3	5	1	1	20	0	1	0	1	1	0	2	23	1	4	2
350	0	0	1	0	0	1	1	1	1	1	1	6	5	0	0	10	0	1	1	1	1	0	1	55	1	4	4
351	0	0	0	0	0	0	0	0	0	0	0	8	5	0	1	20	0	1	0	1	0	0	2	41	2	1	1
352	1	0	0	1	1	1	1	1	1	1	1	6	0	1	1	30	0	1	1	1	1	0	2	32	1	4	2
353	0	0	1	0	0	1	1	1	1	1	1	5	2	1	0	20	0	1	1	1	1	0	2	65	2	4	2
354	1	1	1	1	1	1	1	1	1	1	1	3	10	0	0	10	0	1	1	1	0	0	2	21	1	3	2
355	0	0	0	0	0	1	1	1	1	1	1	6	2	0	0	2	0	0	0	0	1	0	1	50	1	4	2
356	0	1	1	1	1	1	1	1	1	1	1	6	0	1	1	30	0	1	1	1	1	0	1	49	1	4	3
357	1	0	0	0	0	1	0	1	1	1	1	6	3	0	0	20	0	0	1	1	0	0	1	25	1	4	2
358	0	1	1	1	1	1	1	0	1	1	1	4	3	0	0	3	0	0	0	1	0	0	2	22	1	3	2
359	0	1	1	1	1	1	1	1	1	1	1	6	1	1	1	40	0	0	1	0	1	0	2	49	1	4	2
360	0	0	1	0	0	1	1	1	1	1	1	4	6	0	1	40	40	1	1	0	0	0	1	23	2	3	1
361	0	0	1	0	0	1	1	1	1	1	1	4	0	1	1	30	0	1	1	1	0	0	1	42	1	4	2
362	0	0	0	0	1	1	1	1	1	1	1	3	6	1	1	35	0	1	1	0	0	0	2	22	1	3	1
363	0	0	0	0	0	0	0	0	0	0	0	3	0	1	1	30	0	1	1	1	1	0	2	36	1	4	3
364	1	1	1	0	0	1	1	1	1	1	1	5	3	0	0	15	0	1	1	1	1	0	2	35	1	4	2
365	1	1	1	1	1	1	1	1	1	1	1	4	6	0	1	30	0	1	1	1	1	0	2	58	1	3	3
366	0	1	1	0	0	1	1	1	1	1	1	3	10	0	0	30	0	0	0	1	0	0	1	30	1	3	1
367	0	1	1	1	1	1	1	1	1	1	0	6	4	1	0	200	80	1	0	0	0	0	1	18	1	3	3
368	1	1	1	1	1	1	0	0	1	1	1	6	6	1	1	20	100	1	0	0	0	0	2	24	1	3	3
369	0	0	0	0	0	1	1	0	1	1	1	6	3	1	1	50	0	0	0	1	0	0	2	52	1	4	3
370	1	1	1	1	1	1	1	1	1	1	1	3	0	1	1	31	0	1	0	0	0	0	2	31	1	4	2
371	0	0	0	0	0	0	1	1	1	1	1	5	1	0	0	10	0	1	0	0	0	0	1	54	1	4	2
372	1	1	1	0	0	1	1	0	1	1	1	3	1	1	1	40	0	1	1	1	0	0	2	37	2	4	3
373	0	0	0	1	0	1	1	0	1	1	1	4	10	1	1	3	0	1	1	1	1	1	1	23	1	3	2
374	1	0	0	1	1	1	1	1	1	1	1	5	9	1	0	20	0	0	1	1	0	0	1	24	2	4	2
375	0	1	0	0	0	1	1	1	1	1	1	4	8	0	0	2	50	1	0	1	0	0	1	47	1	4	3
376	0	0	1	0	0	1	1	0	1	0	1	3	4	0	1	5	0	1	1	1	0	0	1	24	1	4	2
377	1	1	1	1	1	1	1	1	1	1	1	4	0	0	1	30	0	1	0	0	1	0	2	38	2	1	1
378	0	0	1	0	0	1	1	1	1	0	1	2	10	0	1	10	0	1	0	0	0	0	2	21	1	3	1
379	1	1	0	1	1	1	1	1	1	1	1	4	3	1	1	28	0	1	1	1	1	0	1	23	1	4	2
380	0	1	0	0	0	1	1	1	1	1	1	4	4	0	1	20	0	1	1	1	1	0	1	54	1	4	3
381	0	1	1	1	1	1	1	1	1	1	1	6	8	1	0	0	0	0	0	1	1	0	2	35	1	4	5
382	1	1	0	1	0	1	1	1	1	1	1	6	3	0	1	25	0	1	1	1	1	0	2	41	1	4	4
383	0	0	0	0	0	1	1	1	1	1	1	4	0	0	1	10	0	1	0	1	1	0	1	42	1	3	2
384	1	0	0	1	1	1	1	1	1	1	1	4	3	1	1	10	0	0	1	1	0	0	2	28	2	4	3
385	0	1	1	0	0	1	1	1	1	1	1	6	0	0	1	30	0	0	0	1	1	0	2	48	1	4	3
386	0	0	0	1	1	1	1	0	1	1	1	4	5	1	1	30	0	0	0	1	0	0	2	46	1	4	3
387	0	1	1	0	0	1	1	0	1	1	1	6	7	1	0	30	0	1	1	1	1	0	2	46	1	4	2
388	0	0	1	0	0	1	1	1	1	1	1	6	5	0	1	26	2	1	1	1	0	0	1	27	2	3	1
389	0	0	1	1	1	1	1	0	1	1	0	4	0	0	0	20	0	1	0	1	1	0	2	30	1	4	2
390	0	1	0	1	0	1	1	1	1	1	1	4	10	1	1	40	0	1	1	1	1	0	2	48	2	4	3
391	1	1	1	0	0	1	1	1	1	0	1	6	10	1	1	30	0	1	1	1	0	0	2	46	1	4	5
392	0	0	1	0	0	0	1	0	1	1	1	5	7	1	1	5	0	1	1	1	1	0	2	29	1	4	4
393	0	0	1	0	0	1	1	0	1	1	1	3	6	0	1	20	0	0	1	0	0	0	2	32	2	3	1
394	0	1	0	1	1	1	1	1	1	1	1	2	4	1	0	10	0	1	1	1	1	0	2	30	1	4	3
395	1	1	1	1	1	1	1	1	1	1	1	4	1	1	1	30	0	1	1	0	0	0	1	48	1	4	4
396	1	1	0	1	1	1	1	1	1	1	1	6	1	0	0	30	0	1	1	1	1	0	1	57	1	3	2
397	0	1	1	1	1	1	1	1	1	1	1	3	1	1	1	60	0	1	1	1	0	0	2	46	1	4	1
398	0	0	1	0	0	1	0	0	1	1	1	3	6	1	1	20	0	1	0	0	0	0	2	44	1	3	2
399	1	1	1	1	1	1	1	1	1	1	1	6	10	1	1	20	0	1	1	1	1	0	1	19	1	3	2
400	0	0	1	0	0	1	1	0	1	1	1	3	3	0	1	30	0	1	1	1	1	0	2	25	1	4	3
401	1	1	0	1	1	1	1	1	1	1	1	3	10	0	1	30	0	0	0	0	1	0	2	22	1	3	1
402	0	0	0	0	0	1	1	0	1	1	1	6	5	1	1	100	0	0	1	1	1	0	2	39	1	4	4
403	0	1	0	1	1	1	1	1	1	1	1	6	3	1	1	30	0	0	1	1	1	0	2	26	1	4	2
404	0	1	1	0	0	1	1	1	1	1	1	4	9	0	1	30	0	1	1	1	1	0	1	29	2	3	4
405	0	1	0	0	0	1	1	1	1	1	1	4	10	1	0	50	0	1	0	1	1	0	2	60	1	3	2
406	0	1	1	1	1	1	1	0	1	1	1	3	3	0	0	10	0	0	0	0	1	0	2	52	2	3	1
407	0	0	1	0	0	1	1	0	1	0	0	8	2	0	1	100	0	0	1	0	1	0	2	46	1	4	1
408	0	0	0	1	0	1	1	0	1	1	1	7	7	0	0	8	0	1	0	0	1	0	1	47	1	4	1
409	0	0	0	0	0	1	1	1	1	1	1	3	6	0	1	20	10	1	0	0	1	0	1	36	1	4	4
410	0	0	1	0	0	1	1	0	0	1	1	4	2	0	0	10	20	1	1	1	1	0	1	47	2	3	2
411	0	1	0	0	1	1	1	1	1	1	1	3	3	0	1	30	0	1	0	0	0	0	2	23	1	4	2
412	0	1	0	1	1	1	1	1	1	1	1	7	3	1	0	20	0	0	1	0	0	0	2	35	2	4	3
413	0	1	1	0	1	1	1	1	1	1	1	3	0	0	1	15	0	0	1	1	1	0	2	33	1	4	2
414	0	1	0	0	0	1	1	1	1	1	1	6	0	0	0	5	0	1	1	0	0	0	1	41	1	4	2
415	1	0	0	0	0	0	1	1	1	1	1	1	3	1	1	30	0	1	0	0	0	0	2	23	1	4	2
416	0	0	1	0	0	1	1	1	1	1	1	2	9	1	0	20	100	0	1	0	0	0	2	29	1	4	2
417	1	0	0	1	0	1	1	1	1	1	1	2	2	1	1	50	100	1	0	0	0	0	2	37	1	3	2
418	1	1	0	1	1	1	1	1	1	1	1	6	0	1	1	60	0	0	1	1	0	0	2	53	1	4	5
419	1	1	1	1	1	1	1	0	1	1	1	4	7	1	0	10	0	0	1	1	0	0	1	55	1	4	3
420	0	0	1	0	0	1	1	0	1	1	1	6	5	1	1	60	0	1	0	0	0	0	1	44	1	4	2
421	0	1	1	1	1	1	1	1	1	1	1	4	6	1	1	15	0	1	1	1	1	0	2	31	2	4	2
422	0	1	1	0	0	1	1	0	1	1	0	4	3	1	0	20	0	1	1	1	0	0	1	64	1	4	2
423	1	1	1	0	0	1	1	1	1	1	1	6	5	0	1	30	0	0	1	0	0	0	2	50	1	4	2
424	0	0	1	0	0	1	1	1	1	1	1	3	1	0	1	90	0	0	1	1	0	0	1	30	1	4	3
425	0	0	0	0	0	1	1	0	1	1	1	8	3	0	1	0	0	0	1	0	1	0	1	52	1	3	2
426	1	1	1	0	1	1	1	0	1	1	1	6	5	1	1	30	0	1	1	1	1	0	2	38	1	4	6
427	0	0	1	0	0	1	1	1	1	1	1	4	5	1	1	30	0	1	1	0	0	0	2	50	1	4	4
428	1	1	0	0	1	1	1	1	1	1	1	4	9	0	1	25	0	1	1	0	1	0	2	36	2	4	2
429	0	1	0	0	1	1	1	0	1	1	1	3	0	1	1	40	0	0	1	0	0	0	2	53	1	3	3
430	0	1	0	0	0	1	1	0	1	1	1	6	0	0	1	2	0	1	0	1	1	0	1	54	1	1	3
431	1	1	0	1	1	1	1	1	1	1	1	6	0	0	1	15	0	1	0	0	0	0	1	37	1	4	2
432	1	0	1	0	0	1	1	1	1	1	1	6	2	1	1	30	0	1	1	1	1	0	2	37	1	4	4
433	0	1	1	1	1	1	1	1	1	1	1	5	10	1	1	40	0	0	0	1	0	0	1	31	1	4	4
434	0	0	0	0	0	0	1	0	1	1	1	8	1	1	1	20	0	1	0	1	0	0	2	39	1	4	2
435	1	0	1	0	0	1	1	1	1	1	1	5	2	0	1	50	0	1	1	1	1	0	1	30	2	3	2
436	0	1	0	0	0	1	1	1	1	1	1	2	6	0	1	20	0	0	1	0	0	0	2	22	1	4	2
437	1	0	0	0	0	1	1	1	1	1	1	4	5	1	1	30	0	1	1	1	0	0	2	34	1	4	2
438	0	1	0	0	1	1	0	1	1	1	1	3	1	1	1	30	0	1	1	1	1	0	2	29	1	4	1
439	0	1	0	0	0	1	1	0	1	1	1	2	0	0	0	35	0	1	1	1	0	0	2	44	1	4	2
440	0	0	1	0	0	0	1	0	1	1	1	6	0	1	1	40	0	1	1	1	1	0	2	37	1	4	2
441	1	1	1	1	1	1	1	1	1	1	1	6	7	0	0	5	0	0	0	0	1	0	2	29	2	3	1
442	0	0	1	0	0	1	1	1	1	1	1	4	0	1	1	10	0	1	1	1	0	0	2	37	1	4	2
443	0	1	0	1	1	1	1	1	1	1	1	2	5	0	1	20	0	1	1	1	0	0	2	20	1	3	2
444	1	1	0	0	1	1	1	1	1	1	1	6	1	0	0	20	0	0	1	1	0	0	2	26	1	4	2
445	0	1	1	1	0	1	1	0	1	1	1	2	4	1	1	15	0	0	0	1	0	0	2	19	2	3	1
446	0	1	1	1	1	1	1	1	1	0	1	4	1	1	1	25	0	1	1	1	0	0	1	45	1	4	2
447	0	0	1	1	1	1	1	1	1	1	1	5	7	0	1	30	0	1	0	0	0	0	1	29	2	3	3
448	0	0	1	0	0	1	1	1	1	1	1	4	2	0	0	5	0	0	1	0	1	0	1	43	1	4	3
449	0	0	1	1	1	1	1	0	1	1	1	3	4	1	1	15	60	1	0	0	0	0	1	28	1	3	3
450	1	0	0	0	0	0	1	1	1	1	1	6	0	1	1	0	0	1	1	1	1	0	1	66	1	4	3
451	1	1	0	0	0	1	1	1	1	1	1	4	1	1	0	3	0	1	0	1	1	0	1	45	1	4	4
452	0	1	0	0	0	0	1	0	1	0	0	8	5	0	1	30	0	1	1	0	1	0	2	68	1	3	2
453	0	0	1	0	0	1	1	1	1	1	1	6	5	1	1	10	0	0	0	0	1	0	2	67	1	3	2
454	0	0	1	0	0	1	1	1	1	1	1	4	1	1	1	30	0	0	1	0	1	1	1	58	1	4	2
455	0	0	0	1	0	0	1	0	1	0	0	6	7	0	1	7	47	1	1	0	0	0	1	39	1	3	3
456	0	0	1	0	0	1	1	0	1	1	1	6	10	1	1	20	0	1	1	1	1	0	2	68	2	4	1
457	1	1	0	1	1	1	1	1	1	1	1	4	10	0	1	30	20	0	0	0	0	1	1	40	1	4	2
458	0	0	1	0	0	1	1	1	1	1	1	4	5	1	1	70	0	1	1	0	1	0	1	48	1	4	2
459	0	0	1	0	0	1	1	1	1	1	1	4	3	1	0	15	0	1	1	1	0	0	1	68	1	3	3
460	1	1	1	0	0	1	0	0	0	1	1	5	7	1	0	5	0	1	0	0	0	0	1	41	1	4	1
461	0	0	0	0	0	1	1	1	1	1	1	6	0	0	1	50	0	1	1	1	1	0	1	51	1	4	3
462	0	0	1	0	0	1	1	1	1	1	1	4	3	1	0	3	0	1	0	0	0	0	2	28	1	4	3
463	1	0	0	1	0	1	1	1	1	1	1	3	1	0	1	28	0	1	0	0	0	0	1	47	1	4	3
464	0	0	1	0	0	1	1	0	1	0	0	2	10	1	0	40	0	1	0	0	0	0	1	39	2	4	1
465	0	0	1	0	0	1	1	1	1	1	1	6	5	0	1	30	0	1	0	1	1	0	2	67	1	1	1
466	0	0	1	1	1	1	1	1	1	1	1	4	7	0	1	30	100	1	0	0	0	0	1	44	1	3	2
467	0	0	0	1	1	1	1	0	1	1	1	6	1	1	1	30	0	1	1	1	1	0	2	53	1	4	3
468	1	1	0	1	1	1	1	1	1	1	1	5	0	1	1	10	0	1	1	1	1	0	1	70	1	4	3
469	0	0	0	0	0	1	1	1	1	1	1	6	0	1	1	60	0	1	1	0	1	0	2	53	2	3	2
470	0	0	1	0	0	0	0	0	0	0	0	4	5	1	1	30	5	1	1	1	1	0	1	51	1	4	2
471	0	0	1	0	0	1	1	1	1	1	1	3	10	0	1	30	0	1	0	0	0	0	2	59	1	4	2
472	0	1	1	0	0	1	1	0	1	1	1	2	0	0	1	30	0	1	1	0	1	0	1	76	1	3	1
473	0	0	1	0	0	1	1	1	1	1	1	6	0	0	1	10	0	0	1	1	1	0	2	46	1	4	3
474	0	0	0	0	0	1	1	1	1	1	1	6	2	0	0	1	0	1	0	1	1	0	1	57	1	3	1
475	0	1	0	0	1	1	1	0	1	1	1	3	0	1	0	15	0	0	1	0	0	0	1	52	1	4	2
476	1	1	0	0	0	1	1	1	1	1	1	5	2	0	0	20	0	1	1	1	1	0	2	59	1	3	1
477	0	1	0	1	1	1	1	1	1	1	1	3	1	1	1	30	0	1	1	1	1	0	1	59	1	4	2
478	0	0	1	0	0	1	1	1	1	1	1	5	5	0	0	50	0	1	1	1	1	0	2	52	1	4	3
479	0	1	1	1	0	1	0	1	1	1	1	3	7	0	1	5	100	0	0	1	1	0	1	43	1	1	1
480	0	0	1	0	0	0	1	1	1	0	1	2	4	0	1	30	0	1	0	1	1	0	1	58	2	4	2
481	0	1	0	1	1	1	1	1	1	1	1	6	1	0	0	5	0	1	0	1	0	0	1	23	1	3	2
482	0	1	1	0	0	1	1	1	1	1	1	4	6	1	1	30	0	1	1	1	1	0	1	42	1	4	2
483	0	0	0	0	0	1	1	1	1	0	0	6	5	0	0	10	0	0	0	0	1	0	1	30	1	4	5
484	0	0	1	0	1	0	1	0	0	1	1	5	3	1	1	20	0	1	1	1	1	0	2	60	1	4	1
485	0	0	0	0	0	1	1	1	1	1	1	3	5	0	0	10	15	1	0	1	0	0	1	41	1	4	2
486	0	0	0	0	0	0	1	0	1	1	1	6	0	0	0	20	0	0	0	0	1	0	1	47	1	4	3
487	0	0	0	0	0	1	1	1	1	1	1	2	0	1	1	30	0	1	1	1	0	0	2	40	1	4	3
488	0	0	0	0	0	1	1	0	1	1	1	4	1	0	1	30	0	0	1	1	0	0	1	40	1	4	2
489	1	0	0	0	0	1	1	1	1	1	1	4	3	0	1	70	2	1	1	1	1	0	1	36	1	4	3
490	1	1	1	1	1	1	0	1	1	1	1	4	6	1	1	40	0	0	1	0	1	0	1	30	1	4	6
491	0	1	0	0	1	1	1	1	1	1	1	4	7	0	1	30	0	0	1	1	0	0	1	54	1	4	2
492	1	1	1	0	0	1	1	1	1	1	1	4	4	1	0	20	40	1	0	0	0	0	1	31	1	4	3
493	0	1	0	1	0	1	1	1	1	1	1	6	1	1	1	8	0	1	1	1	1	0	2	60	1	4	2
494	0	0	1	0	0	1	1	0	1	1	1	4	5	1	0	8	0	1	0	1	1	0	2	64	1	4	2
495	0	0	0	0	0	1	1	0	1	1	1	6	3	1	1	30	0	1	1	1	1	0	2	53	2	4	3
496	0	0	1	0	0	1	1	1	1	1	1	5	0	1	1	30	0	1	1	1	1	0	1	66	1	4	2
497	0	0	0	0	0	1	1	1	1	1	1	4	7	1	1	10	0	0	0	1	1	0	2	57	1	4	2
498	0	0	1	0	0	0	1	0	0	0	0	4	1	1	1	30	0	1	1	1	0	0	1	53	1	3	2
499	0	0	0	0	0	1	1	1	1	1	1	7	5	1	1	30	0	0	1	1	1	0	1	61	1	4	2
500	1	1	1	1	1	1	1	1	1	1	1	5	2	0	0	20	0	1	1	1	1	0	1	65	1	4	3
501	1	1	0	0	1	0	1	1	1	1	1	6	6	1	1	10	0	1	1	1	1	0	1	49	2	4	3
502	0	0	1	0	0	1	1	1	1	1	1	6	4	0	0	5	0	1	1	1	1	0	1	23	1	4	1
503	0	0	0	0	0	1	1	1	1	1	1	6	5	0	1	25	0	1	1	1	1	0	1	48	2	4	3
504	1	1	0	1	1	1	1	1	1	1	1	6	3	0	0	10	0	0	1	0	0	0	1	44	1	4	4
505	0	0	0	0	1	1	0	1	0	1	1	3	6	1	1	30	100	0	0	0	1	0	1	40	1	4	4
506	0	1	0	0	0	1	1	1	1	1	1	4	0	0	0	2	0	0	0	0	1	0	2	16	2	2	1
507	1	1	1	0	0	1	1	1	1	1	1	4	2	0	1	20	0	0	1	0	0	0	2	16	2	2	1
508	1	1	0	1	1	1	1	0	1	1	1	5	4	0	0	40	0	1	1	1	1	1	2	30	1	4	4
509	0	0	0	1	1	0	0	0	0	1	0	5	4	1	1	5	0	0	0	1	0	0	2	20	1	3	1
510	1	1	1	0	0	1	1	0	1	1	1	5	3	0	0	2	0	1	0	0	0	1	1	29	1	3	2
511	0	0	0	1	1	1	1	1	1	1	1	4	4	1	1	20	0	0	1	0	0	0	2	45	1	4	5
512	0	0	1	1	1	1	1	1	1	1	1	2	6	0	1	20	0	0	0	0	1	0	2	24	2	4	2
513	1	0	0	0	0	1	1	1	1	1	1	5	7	1	0	31	10	1	0	0	0	1	1	17	1	2	1
514	1	1	1	0	0	1	1	1	1	1	1	8	7	0	0	30	0	1	1	1	1	1	2	27	1	3	2
515	1	1	1	1	0	1	1	1	1	1	1	4	4	0	1	30	0	1	1	0	0	1	2	23	2	4	2
516	0	0	1	0	0	1	1	1	1	1	1	3	6	1	0	20	0	1	1	1	0	1	2	25	1	4	2
517	0	0	0	0	0	0	0	0	0	0	0	3	5	0	1	0	0	0	1	0	0	0	2	49	2	3	2
518	1	1	0	1	1	1	1	1	1	1	1	7	1	0	1	45	0	0	0	1	0	0	2	47	1	4	2
519	1	1	0	1	0	1	1	1	1	1	1	4	0	1	0	30	0	0	1	1	1	0	2	30	1	4	2
520	1	0	1	0	0	1	1	0	1	1	1	6	3	1	1	40	0	1	0	0	0	1	2	23	2	4	2
521	0	1	1	0	0	1	1	1	1	1	1	4	1	0	1	25	0	1	1	1	1	1	1	48	1	4	5
522	0	0	0	1	1	1	1	0	1	1	1	5	4	0	1	30	0	0	0	1	0	0	2	32	1	4	3
523	0	0	1	0	0	1	1	0	1	1	1	2	0	1	1	30	0	1	1	1	1	1	2	30	1	4	2
524	0	0	0	0	0	1	1	1	1	1	1	4	5	0	1	20	0	0	1	0	1	0	2	34	2	3	1
525	1	1	1	1	1	1	1	1	1	1	1	5	3	0	0	5	0	1	1	0	1	1	2	30	1	4	2
526	0	1	0	0	0	1	1	0	1	1	1	4	0	1	1	10	5	0	0	1	0	0	1	38	2	3	2
527	1	1	1	1	1	1	1	0	1	0	1	4	1	1	1	30	0	0	1	0	0	0	2	16	1	2	1
528	0	0	1	1	0	1	1	1	1	1	1	7	5	0	1	30	0	1	1	1	1	1	2	23	2	4	1
529	0	0	1	0	0	1	1	1	1	1	1	5	8	0	1	0	0	0	1	0	1	0	2	30	1	4	2
530	0	1	0	1	1	1	1	1	1	1	1	4	2	0	0	10	0	1	1	1	1	1	2	31	1	4	2
531	1	0	0	0	1	1	1	1	1	1	1	2	6	1	1	30	0	0	1	0	0	0	2	16	1	2	1
532	1	0	1	1	0	1	0	0	0	1	1	3	1	1	1	1	0	0	0	1	0	0	2	39	2	4	6
533	0	1	1	0	1	1	0	0	1	0	1	3	5	1	0	1	0	0	1	0	0	0	2	18	1	3	3
534	0	1	1	0	0	0	1	0	1	1	1	2	4	1	1	30	0	1	1	1	1	1	2	23	1	4	2
535	1	1	1	0	0	1	1	1	1	0	0	3	5	0	1	30	0	0	1	1	0	0	2	16	1	2	2
536	1	1	0	0	0	0	0	0	0	0	0	4	10	1	0	10	100	0	1	1	1	0	1	35	2	3	1
537	0	0	1	0	0	1	1	0	1	1	1	4	5	0	0	20	0	1	1	0	0	1	1	18	2	3	4
538	1	1	0	1	1	1	1	1	1	1	1	6	10	1	1	50	0	1	0	0	1	1	2	35	1	4	6
539	1	0	1	0	1	1	1	1	1	1	1	5	1	0	1	60	0	0	0	0	1	0	1	33	1	4	2
540	1	0	1	0	0	1	1	1	1	1	1	6	10	0	0	15	50	0	0	0	1	0	2	17	1	2	3
541	0	0	1	1	1	1	1	0	1	1	1	6	4	0	1	40	0	1	1	1	1	1	1	33	1	4	4
542	0	1	1	1	1	1	1	1	1	1	1	6	3	0	1	0	0	0	0	0	1	0	2	46	1	4	2
543	1	1	0	1	1	1	1	1	1	1	0	2	5	0	1	20	0	0	0	0	1	0	2	56	2	3	1
544	0	1	1	0	0	1	1	1	1	1	1	3	4	1	1	30	0	1	1	1	0	1	2	23	1	4	2
545	0	0	0	0	0	1	1	1	1	0	1	2	0	0	1	100	30	0	0	0	1	0	2	23	2	4	2
546	0	0	1	1	0	1	1	0	1	0	0	4	10	0	1	31	0	1	0	0	0	1	2	44	1	4	3
547	0	0	1	0	0	1	1	1	1	1	1	6	6	0	1	90	0	1	1	1	1	1	2	31	1	4	6
548	1	1	1	0	0	1	1	1	1	1	1	3	0	0	1	40	0	0	1	1	1	0	2	22	1	4	2
549	0	0	0	1	1	1	1	0	1	1	1	4	6	1	0	5	0	1	0	0	0	1	2	25	1	4	2
550	1	0	0	0	0	1	1	0	1	1	1	3	5	0	1	30	0	1	1	1	1	1	2	59	1	4	3
551	0	0	1	0	0	0	1	1	1	0	1	3	10	1	1	20	0	0	1	0	0	0	2	65	1	3	2
552	1	1	0	1	1	1	1	1	1	1	1	6	7	1	1	20	0	1	0	1	1	1	2	18	1	3	1
553	0	0	0	0	0	0	1	0	1	1	1	2	5	0	0	20	0	1	0	0	0	1	2	18	1	1	1
554	1	1	0	1	1	1	1	1	1	1	1	6	8	1	1	100	0	0	0	1	0	0	2	31	1	4	6
555	0	1	1	1	0	1	1	1	1	1	1	6	2	0	1	60	3	0	0	1	1	0	2	36	2	3	2
556	1	1	1	0	1	1	1	1	1	1	1	5	6	0	1	50	20	1	0	1	0	1	1	18	1	2	3
557	0	1	1	1	1	1	1	1	1	1	1	4	0	0	1	30	0	0	1	0	0	0	1	48	2	3	3
558	0	0	1	1	1	1	1	1	1	1	1	3	5	0	1	40	0	1	0	0	0	1	2	16	1	2	1
559	0	1	1	1	1	1	1	0	1	1	1	4	8	1	1	20	0	1	0	1	0	1	2	26	1	3	2
560	0	1	0	1	1	1	1	1	1	1	1	2	5	0	1	0	0	0	0	1	0	0	1	23	1	3	6
561	0	1	1	0	0	1	1	0	1	1	1	7	10	0	1	20	0	0	0	1	0	0	2	21	2	4	3
562	0	1	1	0	0	1	1	1	1	1	1	3	8	1	1	28	50	1	1	1	1	1	1	28	2	1	1
563	0	1	1	0	1	1	1	0	1	1	1	1	10	0	0	10	0	1	1	0	1	1	2	18	2	3	1
564	0	0	1	1	1	1	1	0	1	1	1	6	8	0	1	10	0	1	0	1	0	1	1	18	1	2	1
565	0	0	0	1	0	0	1	1	1	1	1	3	2	1	0	7	0	1	0	1	1	1	2	17	1	2	1
566	0	1	0	0	0	1	1	0	0	1	1	3	0	1	0	20	0	1	1	1	1	1	1	41	1	4	3
567	0	0	1	1	1	1	1	1	1	1	1	6	4	1	1	20	0	1	1	1	1	1	1	40	2	2	1
568	1	1	1	1	0	1	1	1	1	0	1	6	3	1	1	15	0	1	1	1	1	1	2	18	1	3	1
569	1	0	1	0	1	1	0	0	1	1	1	4	5	1	0	5	0	1	1	1	0	1	2	16	2	2	1
570	1	0	0	0	0	0	0	0	0	1	0	2	6	0	1	30	0	1	0	0	0	1	2	20	1	4	2
571	0	1	1	1	1	1	1	1	1	1	1	4	7	0	0	7	0	0	1	0	0	0	2	19	1	2	1
572	0	0	1	0	1	1	1	1	1	1	1	5	2	0	0	4	0	0	0	0	1	0	2	20	1	4	4
573	0	0	1	1	0	1	1	0	0	1	1	4	0	1	1	20	0	1	0	0	0	1	2	18	2	3	1
574	1	1	1	0	0	1	1	1	1	1	1	3	5	0	1	50	0	1	0	0	0	1	1	33	1	4	3
575	0	1	0	1	1	1	1	0	1	1	0	4	2	0	1	50	20	1	0	0	0	1	1	26	1	4	4
576	0	1	0	0	0	1	1	1	1	1	1	3	1	1	1	20	0	1	1	1	1	1	1	44	2	3	2
577	0	1	1	1	1	1	0	1	1	1	1	4	2	0	1	30	0	0	0	1	0	0	1	36	1	3	2
578	1	1	0	0	1	1	1	1	1	0	1	4	5	0	1	30	100	1	0	0	0	1	2	56	2	3	1
579	0	1	0	1	0	1	1	0	1	1	1	5	4	1	1	15	0	0	1	0	0	0	1	21	2	3	3
580	0	1	0	0	1	1	1	0	1	1	1	4	5	0	1	15	0	1	0	0	1	1	2	15	1	1	1
581	1	1	0	1	1	1	1	1	1	1	1	2	0	0	1	30	0	0	0	1	0	0	2	56	2	3	1
582	0	1	1	1	0	1	1	0	1	1	1	4	6	1	0	100	0	0	0	0	1	0	2	20	1	3	1
583	0	0	1	1	1	1	1	0	1	0	0	6	6	0	1	4	1	0	1	0	0	0	1	17	1	3	5
584	1	0	1	1	1	1	1	1	1	1	1	4	1	0	1	20	0	1	0	0	0	1	1	18	2	2	2
585	0	1	1	0	0	1	1	0	1	1	1	3	7	1	0	40	1	1	1	1	0	1	1	19	2	3	2
586	0	0	0	0	0	1	1	1	1	0	0	3	5	1	1	30	0	1	0	0	0	1	2	31	1	4	6
587	0	1	0	1	1	1	1	1	1	1	1	6	5	0	1	90	0	0	1	1	1	0	2	18	2	3	2
588	1	0	0	1	1	1	1	1	1	1	1	3	10	1	1	30	0	1	1	0	0	1	2	29	1	4	2
589	1	1	0	1	1	1	1	1	1	1	1	2	0	1	1	30	0	1	1	1	0	1	2	28	1	4	5
590	0	0	0	1	1	1	1	1	1	1	1	4	5	1	0	20	0	1	0	1	1	1	1	28	1	4	1
591	1	1	0	1	1	1	1	0	1	1	1	2	3	0	0	18	0	0	0	1	0	0	2	18	2	3	1
592	0	1	1	1	1	1	1	1	1	1	1	4	5	1	1	40	0	0	1	0	0	0	2	27	1	4	3
593	1	1	0	0	1	1	1	1	1	1	1	3	6	1	0	50	0	0	0	0	1	0	2	28	1	4	3
594	1	1	0	1	1	1	1	1	1	1	1	4	8	1	1	10	5	1	1	1	1	1	1	36	1	4	6
595	0	1	0	0	0	1	1	1	1	1	1	5	5	0	1	30	10	1	0	0	0	1	1	32	1	4	3
596	0	0	1	0	0	1	1	1	1	1	1	6	5	0	1	15	0	1	0	0	0	1	2	24	1	3	2
597	0	1	1	1	1	1	1	1	1	1	1	4	5	1	1	40	0	0	1	0	0	0	2	27	1	4	3
598	0	0	0	1	0	1	1	0	1	1	0	3	3	0	1	1	50	1	0	1	1	1	2	40	2	4	3
599	1	0	1	1	1	1	1	0	1	0	0	7	8	1	1	3	100	0	1	0	1	0	1	21	2	2	1
600	1	0	1	0	1	1	0	0	0	0	0	5	10	1	1	1	0	0	0	1	0	0	2	0	1	4	2
601	0	0	1	0	0	1	1	1	1	1	1	6	5	0	1	50	0	1	1	1	0	1	2	30	1	4	3
602	0	0	1	0	0	1	1	1	1	1	1	2	8	0	0	2	0	1	1	1	1	1	2	30	1	4	2
603	0	0	0	0	1	1	1	1	1	1	1	7	3	1	1	30	0	1	1	1	1	1	2	33	1	4	3
604	1	1	1	1	1	1	1	1	1	1	1	6	8	1	1	25	0	1	0	1	1	1	2	31	1	4	4
605	0	0	0	0	0	1	0	0	0	1	1	4	10	1	1	29	0	1	1	1	1	1	1	33	1	4	3
606	1	1	0	1	1	1	1	1	1	1	1	5	1	1	1	30	0	1	0	1	0	1	2	33	1	3	2
607	1	0	0	1	1	1	1	1	1	1	1	5	3	1	1	100	0	0	1	1	0	0	1	26	1	4	3
608	1	1	1	1	1	1	0	0	1	1	1	5	2	0	0	10	0	1	1	1	0	1	2	21	1	4	1
609	0	1	0	0	0	1	1	0	0	1	1	4	3	1	1	20	0	1	1	1	1	1	1	39	2	3	2
610	0	1	0	0	0	1	1	0	1	1	1	3	5	1	0	20	0	0	1	0	0	0	1	42	2	3	2
611	1	0	0	0	1	1	0	1	0	1	0	5	7	1	1	1	0	0	0	1	0	0	2	50	1	4	2
612	0	1	0	0	0	1	0	0	1	1	1	5	0	1	0	27	0	1	1	1	1	1	1	36	1	3	2
613	0	0	1	0	0	1	1	1	1	1	1	7	3	0	0	10	0	0	1	1	0	0	2	23	2	4	3
614	1	1	1	1	0	1	1	1	1	1	1	4	6	1	0	30	0	1	1	1	1	1	2	42	1	4	6
615	1	1	1	1	0	1	1	1	1	1	1	4	6	1	0	30	0	1	1	1	1	1	2	42	1	4	6
616	1	1	1	1	1	1	1	1	1	1	1	5	0	1	0	15	0	1	1	1	0	1	2	33	1	4	4
617	0	0	0	1	0	0	1	1	1	1	1	3	2	1	0	7	0	1	0	1	1	1	2	17	1	2	1
618	1	1	1	1	1	1	1	1	1	1	1	3	7	0	1	23	0	0	0	0	1	0	2	23	2	4	3
619	1	1	1	1	1	1	1	0	1	1	1	3	8	1	1	8	0	1	1	1	0	1	2	24	1	4	1
620	1	1	1	0	0	1	0	0	1	0	1	3	1	1	1	20	0	1	1	1	1	1	1	51	2	3	2
621	0	1	0	1	1	1	1	1	1	1	1	3	6	0	1	10	0	1	1	1	0	1	2	29	1	4	3
622	1	1	0	1	1	1	1	0	1	1	1	6	4	0	0	30	0	1	1	1	0	1	2	33	1	4	3
623	0	1	1	0	0	1	1	1	1	1	1	8	10	0	0	30	0	0	0	1	0	0	2	38	2	3	2
624	1	1	0	1	1	1	1	1	1	1	1	3	7	0	0	10	0	0	1	0	0	0	1	50	1	4	3
625	0	0	0	0	0	0	0	0	0	0	0	3	7	1	0	31	100	0	1	0	0	0	1	40	1	4	6
626	0	1	0	1	0	0	0	1	0	0	0	5	7	1	1	31	100	0	1	0	1	0	2	21	2	3	2
627	0	0	1	0	0	0	0	1	0	0	0	5	9	1	0	31	100	0	1	0	0	0	1	35	2	3	2
628	0	1	0	1	0	1	1	1	1	1	1	1	2	0	1	2	10	0	1	0	0	0	1	20	1	4	3
629	0	1	0	0	0	1	1	1	1	1	1	6	9	1	1	30	0	0	1	1	0	0	2	44	1	4	4
630	0	1	1	0	1	0	0	0	1	0	1	4	7	1	1	30	0	1	1	1	1	1	2	34	1	3	2
631	0	1	0	0	0	1	1	0	0	1	0	5	5	1	1	19	0	1	1	1	0	1	1	33	2	3	2
632	1	0	1	0	0	1	0	0	0	0	0	5	4	1	1	8	0	1	0	0	0	1	2	37	1	3	2
633	0	1	0	0	0	1	1	0	1	1	1	6	5	1	1	30	0	1	1	1	0	1	1	47	2	3	2
634	1	1	0	1	0	1	1	1	1	1	1	6	0	0	1	50	0	0	0	1	0	0	2	42	2	4	4
635	0	0	1	1	0	1	1	1	1	1	1	4	3	0	1	30	0	0	0	0	1	0	2	30	1	4	2
636	0	1	0	0	0	0	1	0	1	0	0	4	3	1	1	30	0	1	1	1	1	1	1	51	2	3	2
637	0	0	0	1	1	1	1	1	1	0	1	6	6	1	0	10	0	1	0	0	0	1	2	43	1	4	6
638	0	1	0	0	0	1	1	0	1	1	1	4	4	1	0	20	0	1	1	1	0	1	1	39	1	3	2
639	0	1	0	0	0	1	1	0	1	1	1	3	8	0	1	30	0	0	0	1	0	0	1	29	2	3	1
640	0	1	0	0	0	1	1	0	1	0	1	2	1	0	1	20	0	1	1	1	0	1	1	19	1	3	1
641	0	1	0	0	0	1	0	1	0	1	1	4	5	0	1	29	0	1	1	1	0	1	2	22	2	3	2
642	0	1	0	0	0	1	1	0	1	1	1	3	5	0	1	27	0	1	0	0	1	1	2	20	1	3	2
643	1	1	0	0	0	1	1	0	1	1	1	3	5	0	0	25	0	1	1	0	0	1	2	34	2	2	1
644	1	1	0	0	0	1	1	0	1	1	1	5	5	0	0	30	0	1	1	1	0	1	1	39	1	4	3
645	0	1	0	0	0	1	1	0	1	1	1	3	6	0	1	28	0	0	1	0	0	0	1	32	1	3	2
646	1	1	1	0	0	1	1	1	0	1	0	3	7	1	0	56	67	1	0	0	0	1	1	35	1	4	6
647	0	0	0	0	0	0	1	1	1	0	1	8	5	1	0	15	0	1	0	1	0	1	2	41	1	4	2
648	0	1	0	0	0	1	1	0	0	1	1	4	6	1	1	25	0	1	0	0	1	1	1	38	2	4	3
649	0	1	0	0	0	1	1	0	1	1	1	3	5	0	1	30	0	0	1	0	0	0	2	32	2	3	2
650	0	1	0	0	0	0	0	0	1	0	0	4	6	0	1	30	0	1	1	1	1	1	1	35	2	3	2
651	0	1	1	1	1	1	1	0	1	1	1	6	4	0	0	30	0	1	1	1	1	1	1	35	1	4	4
652	0	1	0	0	0	1	1	0	1	0	0	6	5	1	1	30	0	1	1	0	0	1	1	33	2	3	2
653	0	0	1	1	1	1	1	0	1	1	1	3	4	0	1	50	0	0	0	1	0	0	2	42	1	4	3
654	0	0	1	0	1	1	1	0	1	1	1	3	4	0	0	30	0	0	1	1	0	0	1	38	1	4	3
655	0	1	0	0	0	1	1	0	1	1	1	4	5	0	1	29	0	1	1	1	1	1	2	30	1	3	3
656	0	0	1	1	0	1	1	1	1	1	1	3	6	1	0	30	0	0	0	1	0	0	1	42	1	4	3
657	0	1	1	1	0	1	1	1	1	1	0	4	4	0	0	30	0	1	1	1	1	1	1	28	2	3	2
658	0	1	0	0	0	1	1	0	1	1	1	5	5	1	1	30	0	0	0	1	0	0	1	46	2	3	2
659	1	1	1	1	1	1	1	1	1	0	0	5	5	0	1	30	10	0	0	1	0	0	1	39	1	4	4
660	0	1	0	0	0	1	1	0	1	1	1	3	5	1	1	30	0	1	1	1	0	1	1	43	2	3	2
661	1	0	1	1	1	0	1	0	1	0	1	4	4	0	1	40	0	1	1	1	0	1	1	37	1	4	3
662	1	1	1	1	0	1	1	0	1	0	1	3	5	0	1	10	0	0	0	1	0	0	1	38	1	4	3
663	0	0	0	0	0	0	0	0	0	0	0	4	8	1	0	39	99	0	1	0	0	0	1	38	1	4	3
664	0	1	1	1	1	1	1	0	1	1	1	6	2	0	1	50	0	1	1	1	1	1	2	33	1	4	4
665	0	0	0	1	0	1	0	0	0	0	0	5	9	1	1	20	68	1	0	0	0	1	2	44	2	3	2
666	0	1	1	1	1	1	1	1	1	1	1	4	5	0	1	30	0	0	0	1	0	0	2	60	2	3	1
667	0	0	1	0	0	0	0	0	0	0	0	5	6	0	1	30	3	0	1	0	0	0	1	21	1	3	2
668	0	0	1	0	0	0	0	0	0	0	0	4	9	0	0	30	100	0	1	0	0	0	1	45	1	4	4
669	0	0	0	0	0	0	0	0	0	0	0	6	7	1	1	30	100	1	0	0	0	1	1	40	1	4	2
670	0	0	1	1	0	1	1	0	1	0	0	5	4	1	0	20	0	0	1	1	0	0	2	37	2	3	2
671	0	1	1	1	0	1	1	1	1	1	1	6	3	0	1	60	0	0	1	1	0	0	1	41	1	4	4
672	0	0	1	1	0	1	1	1	1	1	1	4	4	0	0	30	0	1	1	1	1	1	1	41	1	3	3
673	0	0	1	1	0	1	1	0	1	0	1	4	3	0	0	20	0	1	0	1	0	1	2	39	1	4	3
674	0	1	1	1	1	1	1	0	1	1	1	5	7	0	0	40	0	0	0	1	0	0	1	41	1	4	3
675	0	1	1	1	0	1	1	1	1	1	1	5	4	1	1	60	0	0	0	1	0	0	2	35	1	4	4
676	0	1	1	1	0	1	1	0	1	1	1	6	3	1	1	30	0	0	0	0	1	0	1	35	1	4	3
677	0	1	1	1	1	1	1	1	1	1	1	4	10	0	1	30	0	0	0	0	1	0	2	26	1	3	3
678	0	1	0	0	0	1	1	0	1	1	1	3	5	1	1	30	0	1	1	1	0	1	1	43	2	3	2
679	0	1	0	0	0	1	1	0	1	1	1	2	4	0	1	40	0	0	0	1	0	0	1	40	1	3	2
680	0	1	1	0	0	1	1	0	1	1	1	4	5	0	1	40	0	1	1	1	0	1	2	31	1	4	3
681	0	1	1	0	0	1	1	0	1	1	1	3	5	0	1	30	0	1	1	1	1	1	1	24	2	3	2
682	0	1	0	0	0	1	1	0	1	1	1	3	6	0	0	25	0	0	0	0	1	0	1	22	1	3	2
683	0	1	0	0	0	1	1	0	1	1	1	5	5	0	1	30	0	0	1	0	0	0	1	39	1	4	3
684	0	1	0	0	0	1	1	0	1	1	1	2	6	0	0	15	0	1	1	0	0	1	1	29	1	3	2
685	0	1	0	0	0	1	1	0	1	1	1	3	5	0	0	25	0	1	1	1	1	1	1	46	1	3	2
686	0	0	1	1	0	0	1	0	1	1	1	3	4	0	0	30	0	1	0	1	0	1	1	44	1	3	2
687	1	0	1	1	0	1	1	0	1	1	1	4	3	1	1	40	0	1	1	1	0	1	2	37	1	4	3
688	0	1	1	1	0	1	1	0	1	1	1	2	4	0	0	30	0	0	0	1	0	0	1	29	1	3	2
689	0	1	1	1	0	1	1	1	1	1	1	4	4	0	1	40	0	0	0	1	0	0	2	27	1	3	2
690	0	1	0	0	0	1	1	0	1	1	1	5	5	0	1	30	0	0	0	1	0	0	1	25	1	3	2
691	0	1	0	0	0	1	1	0	1	1	1	2	5	0	1	20	9	0	1	1	1	0	2	19	1	3	2
692	0	1	0	0	0	1	1	0	1	1	1	5	5	0	1	30	0	0	0	1	0	0	1	25	1	3	2
693	0	1	0	0	0	1	1	0	1	1	1	4	5	0	1	25	0	1	0	0	0	1	1	38	2	3	1
694	0	1	0	0	0	1	1	1	1	1	1	3	5	1	1	30	0	1	1	1	1	1	1	17	1	2	1
695	0	1	0	0	0	1	1	0	1	1	1	3	5	0	0	20	0	1	1	1	1	1	1	44	1	3	2
696	0	1	0	0	0	1	1	0	1	1	1	3	5	0	0	20	0	1	1	1	1	1	1	44	1	3	2
697	0	1	0	0	0	1	1	0	1	1	1	3	5	0	0	20	0	1	1	1	1	1	1	44	1	3	2
698	1	1	1	1	1	1	1	1	1	1	1	6	2	1	0	15	0	1	1	1	1		2	43	1	4	4
699	1	0	0	1	0	1	0	1	0	1	1	6	2	1	1	30	0	0	0	1	1	0	1	23	1	4	3
700	0	0	1	0	0	1	0	0	1	1	1	6	7	1	1	30	0	0	0	1	1	0	1	45	1	4	3
701	1	1	1	0	0	1	1	0	1	1	1	6	7	0	1	10	0	0	0	1	1	0	1	20	1	4	3
702	1	1	0	1	1	1	1	1	1	1	1	6	5	1	1	30	0	0	1	0	0	0	2	47	1	3	1
703	1	1	1	1	0	1	1	1	1	1	1	5	2	0	0	30	0	1	1	1	1	0	1	25	1	3	4
704	1	0	0	1	1	1	1	1	1	1	1	6	2	0	0	30	0	0	0	1	1	0	2	24	1	4	4
705	1	1	1	1	0	1	1	1	1	1	1	6	6	0	0	30	0	0	0	1	1	0	2	28	1	4	4
